# Supplementary material for: Green synthesis of a CuO/rGO nanocomposite using a Terminalia arjuna bark extract and its catalytic activity for the purification of water
Source: Royal Society of Chemistry journal article supplement (doi:10.1039/d1ma00993a), 2022-01-01
Supplement: d1ma00993a1.pdf [file d1ma00993a1.pdf]

## Green synthesis of CuO/rGO nanocomposites using Terminalia Arjuna bark extract and its expected catalytic behavior towards purification of water

Vanita Kumari, Sandeep Kaushal\*, Prit Pal Singh\*

Sri Guru Granth Sahib World University, Fatehgarh Sahib, Punjab, India

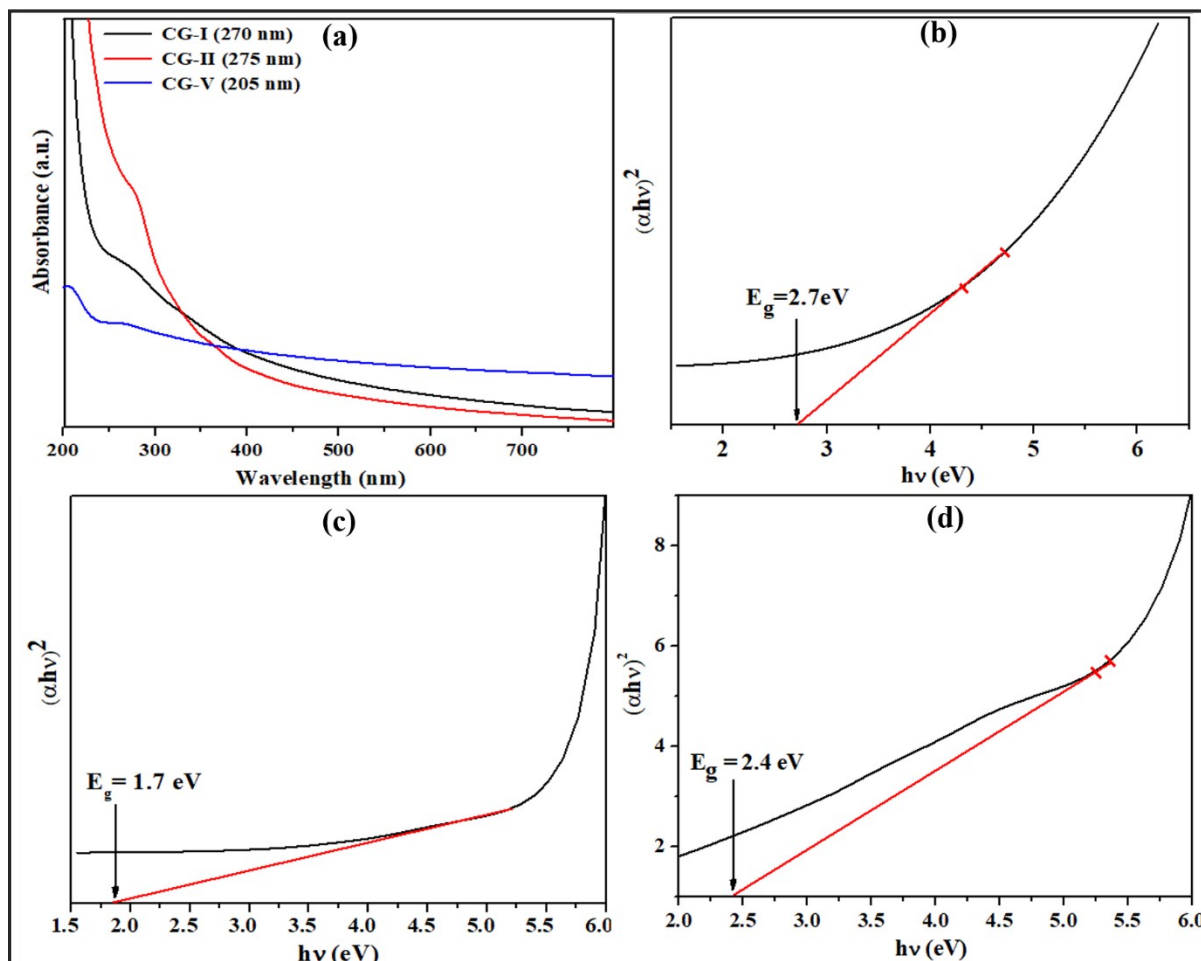

**Fig. S1.** a) UV-visible spectra of CuO, rGO and CuO/rGO nanocomposite; b-d) Tauc plot for CuO, rGO and CuO/rGO nanocomposite

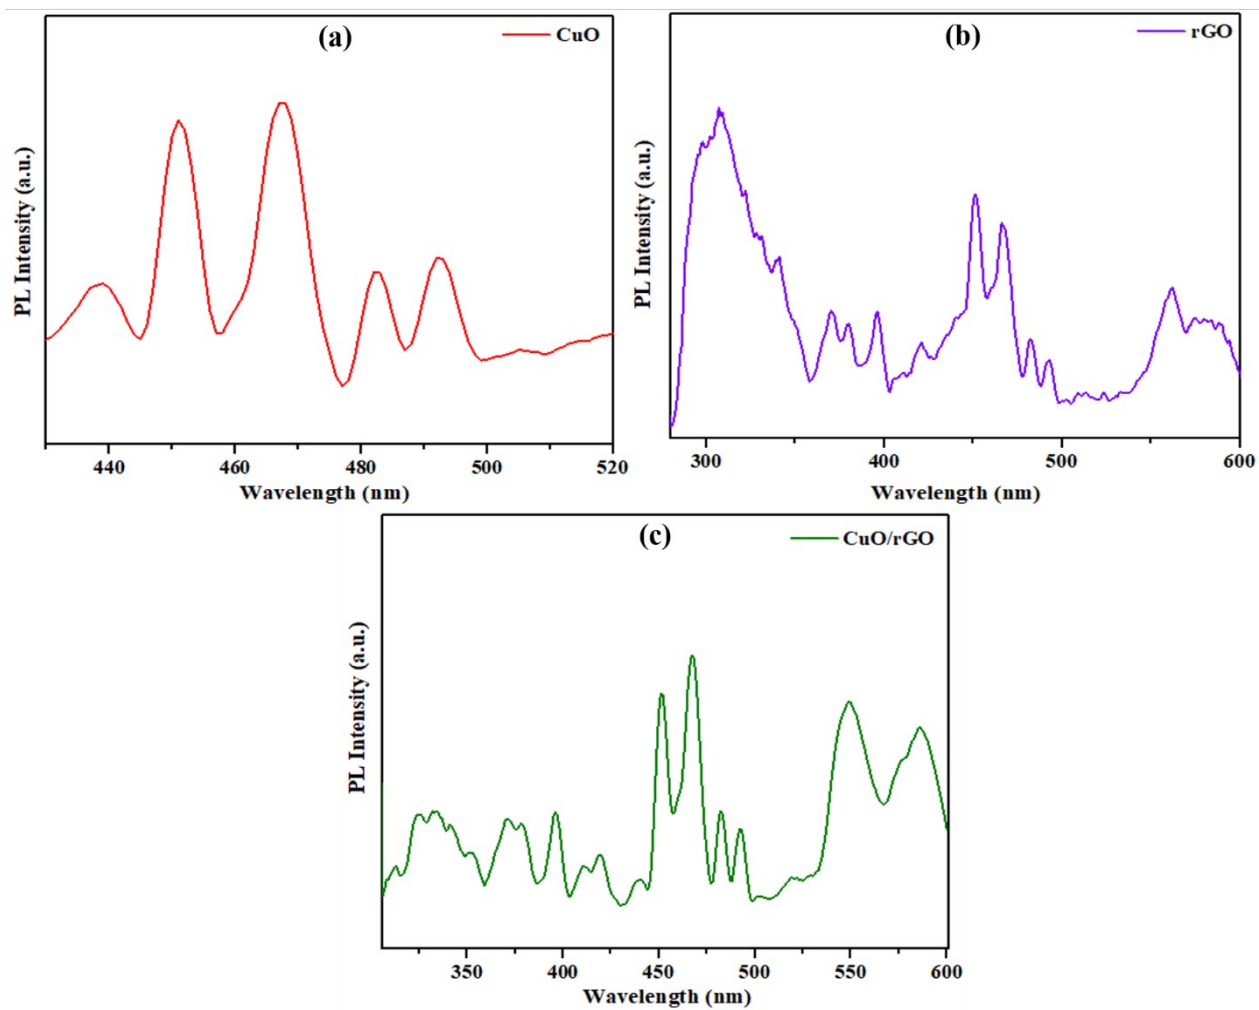

**Fig. S2.** PL spectra of a) CuO; b) rGO and c) CuO/rGO nanocomposite

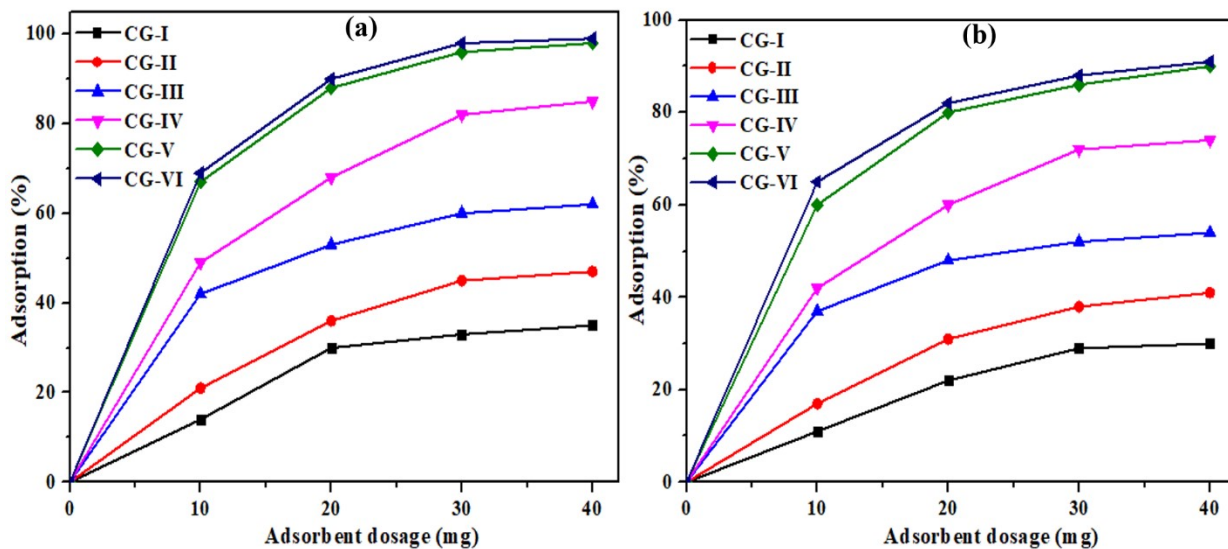

**Fig. S3.** Effect of adsorbent dosage on the percentage adsorption of (a)  $\text{Bi}^{3+}$  and (b)  $\text{Cd}^{2+}$  ions on various adsorbent samples of rGO, CuO and CuO/rGO nanocomposites

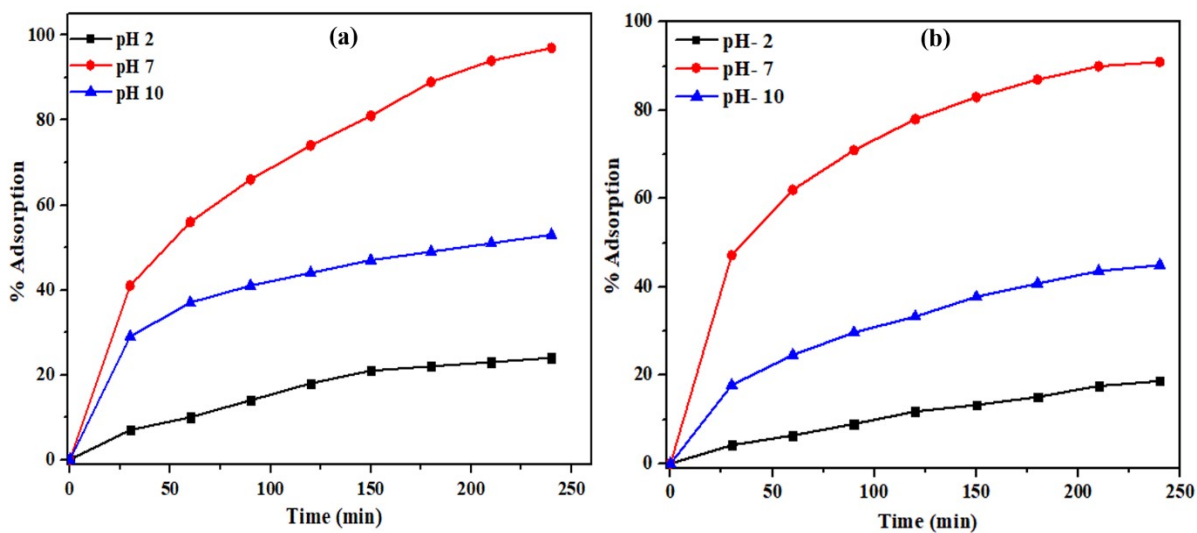

**Fig. S4.** Effect of pH on the percentage adsorption of (a)  $\text{Bi}^{3+}$  and (b)  $\text{Cd}^{2+}$  ions onto CG-V (0.75:1.00) nanocomposite

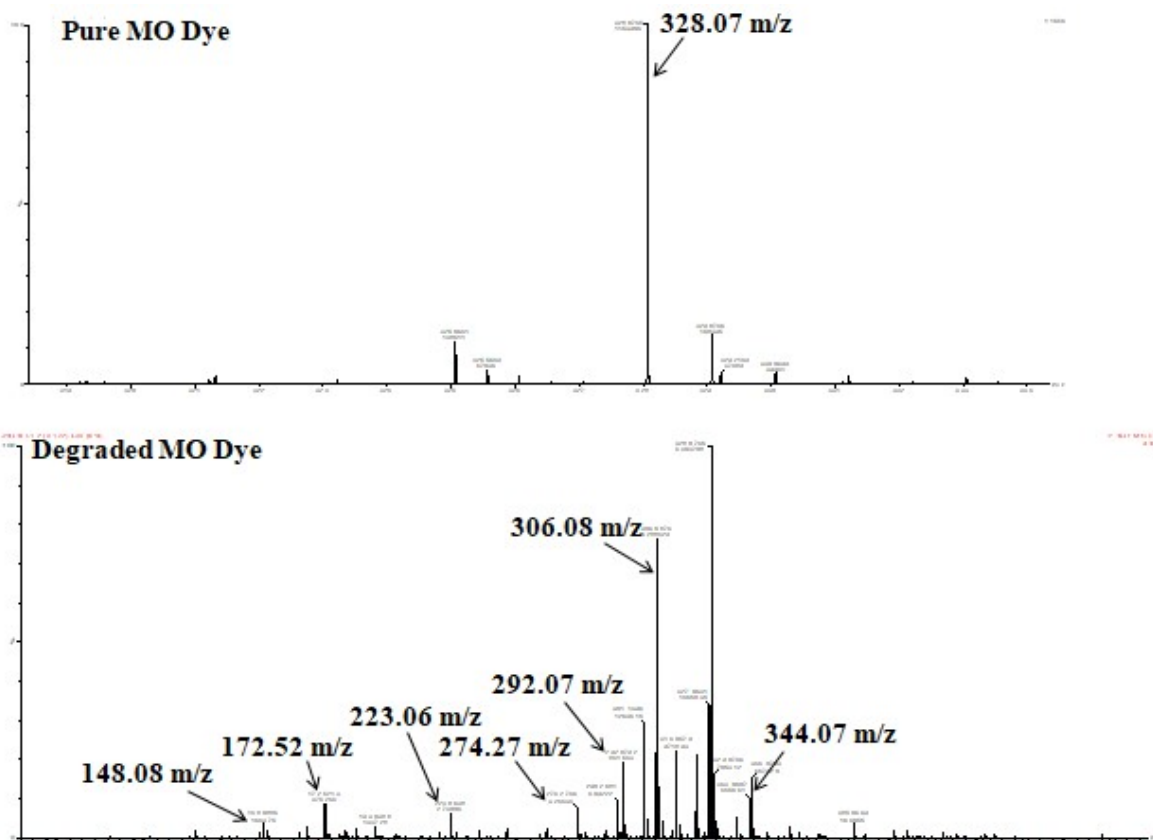

Fig. S5. LC-MS indicating principal by-products of photocatalytic degradation of MO

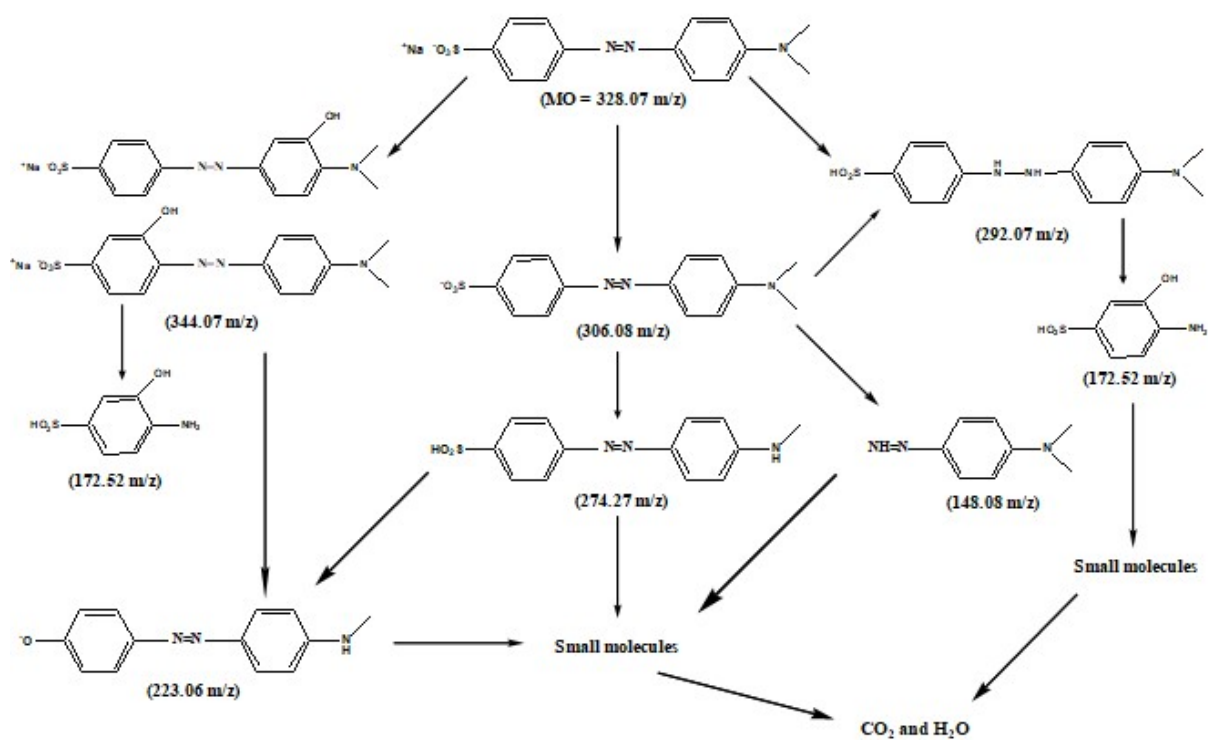

Fig. S6. Probable transformation pathways for photocatalytic degradation of MO

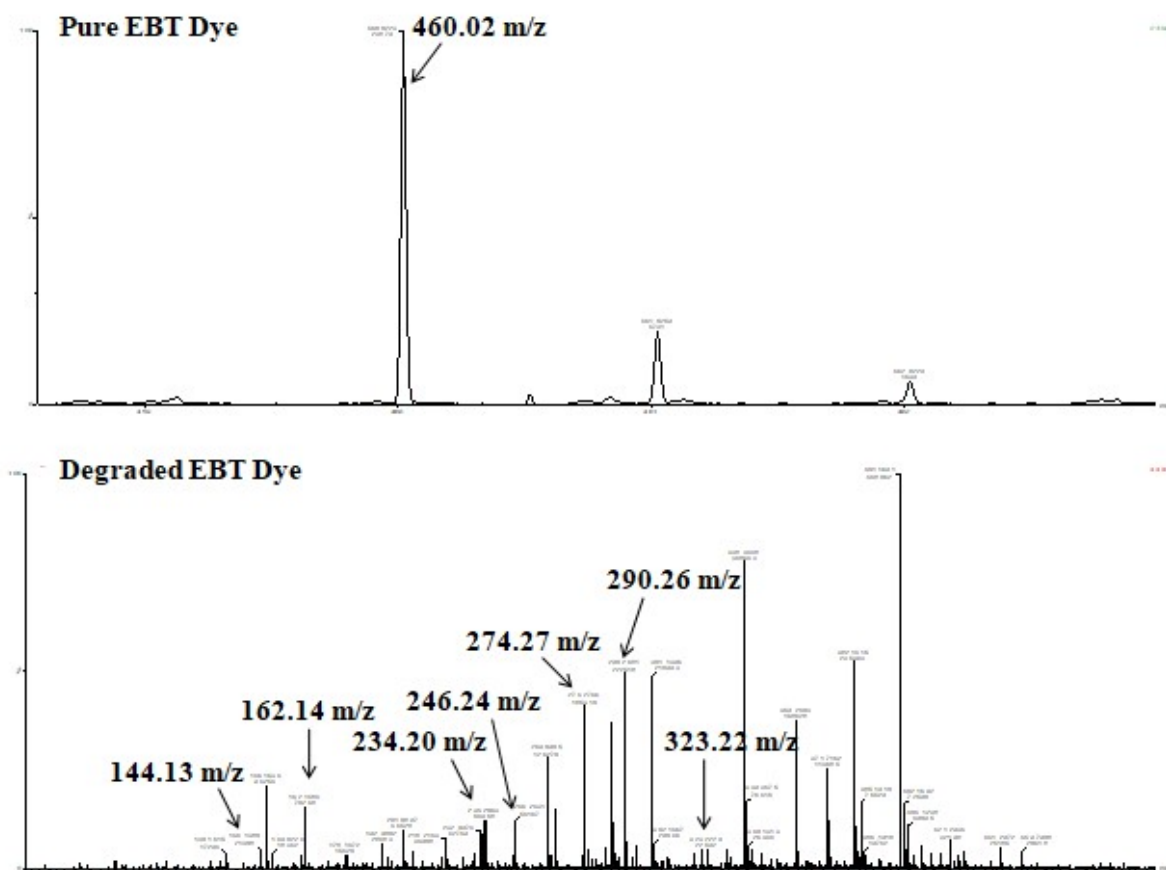

Fig. S7. LC-MS indicating principal by-products of photocatalytic degradation of EBT

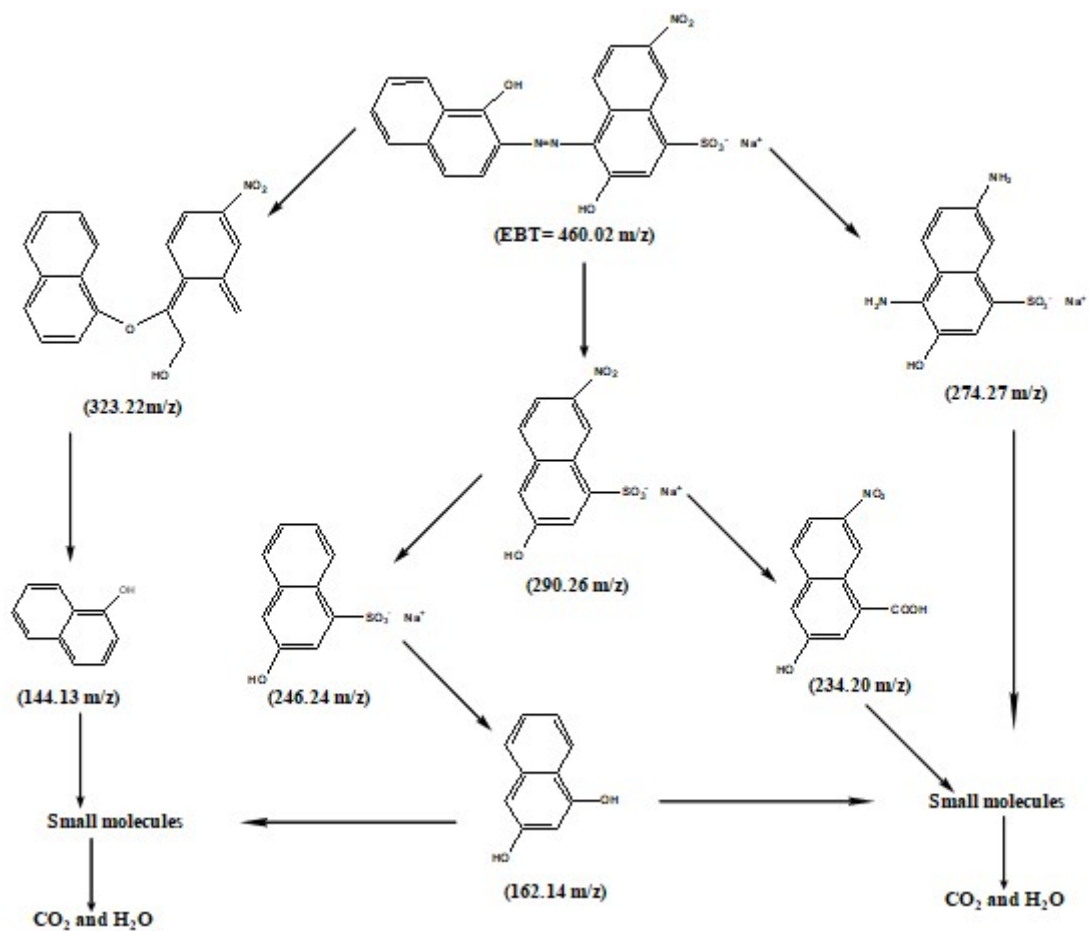

**Fig. S8.** Probable transformation pathways for photocatalytic degradation of EBT

**Table S1.** Various adsorption models for Bi<sup>3+</sup> adsorption on CuO/rGO nanocomposite

| Sample             | Langmuir       |                | Freundlich     |                |     |                | Temkin         |        |                |
|--------------------|----------------|----------------|----------------|----------------|-----|----------------|----------------|--------|----------------|
|                    | q <sub>m</sub> | R <sup>2</sup> | R <sub>L</sub> | K <sub>f</sub> | n   | R <sup>2</sup> | K <sub>T</sub> | B      | R <sup>2</sup> |
| CG-I (0.00:1.00)   | 58.8           | 0.91           | 0.26           | 0.47           | 2.6 | 0.91           | 0.00007        | 0.0006 | 0.93           |
| CG-II (1.00:0.00)  | 70.9           | 0.95           | 0.27           | 0.44           | 2.3 | 0.95           | 0.00009        | 0.0007 | 0.97           |
| CG-III (0.25:1.00) | 52.6           | 0.86           | 0.24           | 0.54           | 4.5 | 0.99           | 0.00005        | 0.0005 | 0.99           |
| CG-IV (0.50:1.00)  | 90.9           | 0.99           | 0.26           | 0.43           | 2.9 | 0.99           | 0.00009        | 0.0008 | 0.99           |
| CG-V (0.75:1.00)   | 138.8          | 0.99           | 0.22           | 0.53           | 3.5 | 0.99           | 0.00008        | 0.0008 | 0.99           |
| CG-VI (1.00:1.00)  | 126.5          | 0.99           | 0.21           | 0.56           | 4.8 | 0.99           | 0.00004        | 0.0004 | 0.99           |

**Table S2.** Various adsorption models for Cd<sup>2+</sup> adsorption on CuO/rGO nanocomposite

| Sample             | Langmuir       |                | Freundlich     |                |      |                | Temkin         |        |                |
|--------------------|----------------|----------------|----------------|----------------|------|----------------|----------------|--------|----------------|
|                    | q <sub>m</sub> | R <sup>2</sup> | R <sub>L</sub> | K <sub>f</sub> | n    | R <sup>2</sup> | K <sub>T</sub> | B      | R <sup>2</sup> |
| CG-I (0.00:1.00)   | 66.6           | 0.99           | 0.29           | 0.30           | 1.62 | 0.99           | 0.00007        | 0.0005 | 0.95           |
| CG-II (1.00:0.00)  | 55.5           | 0.94           | 0.26           | 0.44           | 2.3  | 0.94           | 0.00009        | 0.0007 | 0.95           |
| CG-III (0.25:1.00) | 83.3           | 0.98           | 0.27           | 0.41           | 2.1  | 0.98           | 0.00001        | 0.0008 | 0.99           |
| CG-IV (0.50:1.00)  | 91.5           | 0.99           | 0.27           | 0.41           | 2.3  | 0.99           | 0.00001        | 0.0009 | 0.99           |
| CG-V (0.75:1.00)   | 112.4          | 0.99           | 0.22           | 0.62           | 3.0  | 0.99           | 0.00008        | 0.0007 | 0.99           |
| CG-VI (1.00:1.00)  | 93.4           | 0.96           | 0.21           | 0.58           | 4.9  | 0.96           | 0.00002        | 0.0003 | 0.98           |

**Table S3.** Different variables for pseudo first and second order kinetics for EBT dye

| Sample             | 1 <sup>st</sup> Order Reaction |                | 2 <sup>nd</sup> Order Reaction |                |
|--------------------|--------------------------------|----------------|--------------------------------|----------------|
|                    | K <sub>1</sub>                 | R <sup>2</sup> | K <sub>2</sub>                 | R <sup>2</sup> |
| CG-I (0.00:1.00)   | 0.0041                         | 0.97           | 3.6x10 <sup>4</sup>            | 0.99           |
| CG-II (1.00:0.00)  | 0.0039                         | 0.90           | 3.7x10 <sup>4</sup>            | 0.99           |
| CG-III (0.25:1.00) | 0.0096                         | 0.96           | 3.4x10 <sup>3</sup>            | 0.97           |
| CG-IV (0.50:1.00)  | 0.0122                         | 0.98           | 7.3x10 <sup>3</sup>            | 0.99           |
| CG-V (0.75:1.00)   | 0.0126                         | 0.98           | 1.3x10 <sup>3</sup>            | 0.99           |
| CG-VI (1.00:1.00)  | 0.0368                         | 0.99           | 8.1x10 <sup>3</sup>            | 0.99           |

**Table S4.** Different variables for pseudo first and second order kinetics for MO dye

| Sample             | 1 <sup>st</sup> Order Reaction |                | 2 <sup>nd</sup> Order Reaction |                |
|--------------------|--------------------------------|----------------|--------------------------------|----------------|
|                    | K <sub>1</sub>                 | R <sup>2</sup> | K <sub>2</sub>                 | R <sup>2</sup> |
| CG-I (0.00:1.00)   | 0.0041                         | 0.98           | 1.6x10 <sup>4</sup>            | 0.99           |
| CG-II (1.00:0.00)  | 0.0046                         | 0.98           | 1.7x10 <sup>4</sup>            | 0.99           |
| CG-III (0.25:1.00) | 0.0064                         | 0.97           | 6.7x10 <sup>3</sup>            | 0.99           |
| CG-IV (0.50:1.00)  | 0.0082                         | 0.98           | 7.2x10 <sup>3</sup>            | 0.99           |
| CG-V (0.75:1.00)   | 0.0126                         | 0.99           | 1.6x10 <sup>3</sup>            | 0.99           |
| CG-VI (1.00:1.00)  | 0.0345                         | 0.99           | 8.0x10 <sup>3</sup>            | 0.99           |
